# Supplementary material
Source: PubMed Central journal article supplement (PMC2077074)
Supplement: pnas_0708368104_2.pdf [file pnas_0708368104_2.pdf]

Drosophila melanogaster inaF-PA

MASSTLDLGE KPEENDDVRL PKEQQPPAFF ES**KTFRIISI** **FLYLGGISGL**  
**GMVLALYYLM** **FDSS**SMPDIH LKFPVSIQGH PVQKVHEYQ\*

Drosophila melanogaster inaF-PB

MSGPSALMAN LADVVEAKD EEI PMPKSNF FFES**KTFRLL** **TLLLYMGGVS**  
**GMGLTLAVY** **LFIWDS**RMPP LPVFKHTHPI G\*

Drosophila melanogaster inaF-PC

MANLAKIVNL IESNVKSEVD EVLEEAVRGS TGTGSGSSVR LASSSAPRRS  
ACATSYPVPS PQL EEIVFAE PTYTER**RFARY** **FVIVIYLCGL** **CSLGFFLSIY**  
**HIFFWDS**RMP PVYKGQKKGP AFG\*

Drosophila melanogaster inaF-PD

MNSKHSSLEE KVKLPPTETI SRCYQPQQSN R**KVIRILTVA** **VYVLCVSLAA**  
**IMLSLYYIFI** **WDP**TIRPFVT KATHCDKIVI PEKIAIRLLN SSEVTAEQFY  
KHILEQYRIL SHMQQQRQQL LQRQHLQLQQ LEANNRFQEV FATATI IQAH  
PHPHPPREP PKKPLLGPYS PQPGNISHAM GGDQLDAETE QGHMPLILD  
SPPVEVTGMG HLKRKTHRGH YKHHRARAGG QKKLSIANSM ASSTPSTTAG  
GDASMATAAT LPHGYMDAPL NPAAGTIVQA PQLQLYTSMP IPLILSPSDE  
KRPSHHAHGH VHGERRNGAQ SGRRRRTTTA SVSGYEAQTY LNPFLTGELI  
FEK\*

Drosophila mojavensis inaF-PA

MSEESADPAA DLSDDVRLPK DQPPAAFFES **KTFRLISLVL** **YLGGISGLGM**  
**VLALYYLIFF** **DSG**MPDIHLK FVSIQGPV QKVHEYQ\*

Drosophila mojavensis inaF-PB

MSAPTLNLAA IVKEAKDEEI QVPKSNDFFE **SKTFRLLTLV** **LYMGGVSGMG**  
**LTLAMYYLEFI** **WDS**RMPLPI FKHTHPIG\*

Drosophila mojavensis inaF-PC

MPAEIPASAN LAKIINIIGS NVREMPSEPA SEPPPAAPRE AISPIGSSRS  
VRLASSGTPR RAAICYVPKS PQL EEIVFAE PTCSE**RFARY** **FVLVIYLCGL**  
**CSLGFFLSIY** **HLFFWDS**RMPP PVFKGQKKPP AFG\*

Drosophila mojavensis inaF-PD

MNSKVNSLEE KVKLPPTETI SRCYQPQQSN R**KVIRILTVA** **VYVLCVSLAA**

**IMLSLYYIFI WDP**TIRPFVT KANQCDKIVI PEKIAIRLLN SSEVTAEQFY  
KHILEQYRIL NHLQMQRQQF LQKQHLQLQQ LEASNRFQEV FATATIYQAH  
QQPRDPLQKS KALQAASSLS SASISSLALA NNSSGSSSRD PFRLEPAVNG  
DSSLHHLPLV LDTSPPAEGN IQHVKRKTHR GHYKHRSRA GAKKLAERTG  
GATVTVSTAA SEQPTVAAPL GYMDAPLNPA AGTILQOPLQ LYTSMPIPLI  
LSPSNGEKRL SHHSHSHAHG ERRGMGGAQA RRRATTATVS GYDAQTYLNP  
FLTGELIFEK \*

Anopheles gambiae inaF#1 (XP 311045)

MSYTAEKIK LAGEDSKDRL YEAKQN**QKAI** **RILTVAAYVL** **CVSLVAIMLS**  
**LYYIFFWDP**S TNPMQKQTQT IDTLIIPDHL AIRLANRSEV PASRFFHTFY  
QHLVQDRVVK IRKEVQISES TNLTCLIELY HQQQQQQQQH RPKGQSPDQ  
PLSYQVQAEQ QPGGRASDGP RLHTDEDDGS DDYEQSGNYE LYSNHTTIQL  
DADETGPO\*

Anopheles gambiae inaF#2 (NW045719)

MDGGGDQKAA EPLYARDAET ADGGMFAKKK EEP**KWVRVIV** **VCIYLFVTSF**  
**AALLSLYYI** **FWTP**KIEPY EDDSPERLTG CDQDD\*

Caenorhabditis elegans inaF (NP 505782)

MSQANHLSYS ARMRGRSKQP IYSSDKRAKF TQKDS**QKWIR** **FITVLGYILS**  
**VSLPAISLSV** **YYIYIWD**PGY ITKYPADPIN KTVTIHKSPI LSQKVERDLL  
PMATTIEQKV AESKQIDLAS ILQDGLKSME SKERTSSDNG\*

Danio rerio inaF (NP\_001038855)

MERGKPATYT GDKKAKMAAK TNK**KWVRLAT** **VFAYVLSVSL** **AAIILAIYYS**  
**LIWKP**TSASV SGRSDVLMTT TVMAINTSNI SVSDVSTKVN NTSLVSPKST  
QTTYDLSTSQ MHWGDKKGHE GLLDIPATKM KRTDQAGTSA STHIQRKSGL  
FSTAEVSHVL KTSVLVAGES SEALLAHGAT SSSKQTVYGS SGHDASKNNG  
LVSPTTDQAS WTSYSAGPDV SSLTERGLDL MEGSSALQEE LVTKDTENPI  
GV\*

Gallus gallus inaF (XP\_001232207)

MKEKEAGAER GKPATYTGDK KARMAAKTNK **KWVRLATVLA** **YVLSVSLAAI**  
**VLAVYYSLIW** **QP**VRRGGGGG SSASPPSLPG PAANSSSQPR SAPPQRSAP  
PPPPTPPR GSPAGTGGTE LPAPRGAGEG RSAP\*

Mus musculus inaF #1 (XP 993763)

MRGSSCVGSG GESPGGTGLS EGPRG**RWLRL** **APVCAYFLCV** **SLAAVLLAVY**  
**YGLIWP**TRP PAGPADPLPS AAAAPCARAA PPAPPPAAPA SCLLGASGGP

RPQPGLPRSR RHSRRPAPGA TRETARRAPG \*

Mus musculus inaF#2 (NT 039207)

MKERDAAPAE RGKPATYTGDKKAKMAAKTN **KKWVRLATVF** **AYVLSVSLAA**  
**IVLAVYYSLI** **WQP**VGAGTSG GAVGPPPSGS NTTGPSGTSG VAAGPNTTGS  
SRREAPRDAP PLQAARPAPP EPAADSPLAG PLERPRGLDE DEEEAAEEPR  
SR

Homo sapiens inaF#1 (EAW57469)

MRRRQLAWGR DHAGGGGAGG GRFRERGGGLR GGGGAWWGRG LCGLRRGAEW  
AAGMRGTSCV GGGAESPGBLSEGPRGRW **LRLAPVCAYF** **LCVSLAAVLL**  
**AVYYGLIWP** TRSPAAPAGP QPSAPSPPCA ARPGVPPVPA PAAASLSCLL  
GVPGGPRPQL QLPLSRRRRY SDPDRRPSRQ TPRETPEAAE GRRPG

Homo sapiens inaF#2 (XM 373626)

MKERDAAPAE RGKPATYTGDKKAKMAAKTN **KKWVRLATVF** **AYVLSVSLAA**  
**IVLAVYYSLI** **WQP**VGAGTSG GAAGPPPGBS NATGPSGTSG AAAAXPNTTG  
SSRREAPRDV PPLQAARPAPPPEPPADSPPA GPLERPRGPD EDEEETAAP  
GSR\*
